# Supplementary material for: A Minimum Epitope Overlap between Infections Strongly Narrows the Emerging T Cell Repertoire
Source: PubMed Central journal article supplement — Cell Rep. 2016 Oct 11;17(3):627–35. doi: 10.1016/j.celrep.2016.09.072 (PMC5081394; doi:10.1016/j.celrep.2016.09.072), 2016-10-11
Supplement: mmc1.pdf [file mmc1.pdf]

**Cell Reports, Volume 17**

**Supplemental Information**

**A Minimum Epitope Overlap between Infections  
Strongly Narrows the Emerging T Cell Repertoire**

**Susanne G. Oberle, Layane Hanna-El-Daher, Vijaykumar Chennupati, Sarah Enouz, Stefanie Scherer, Martin Prlic, and Dietmar Zehn**

## Supplementary Figure 1 (related to Figure 1):

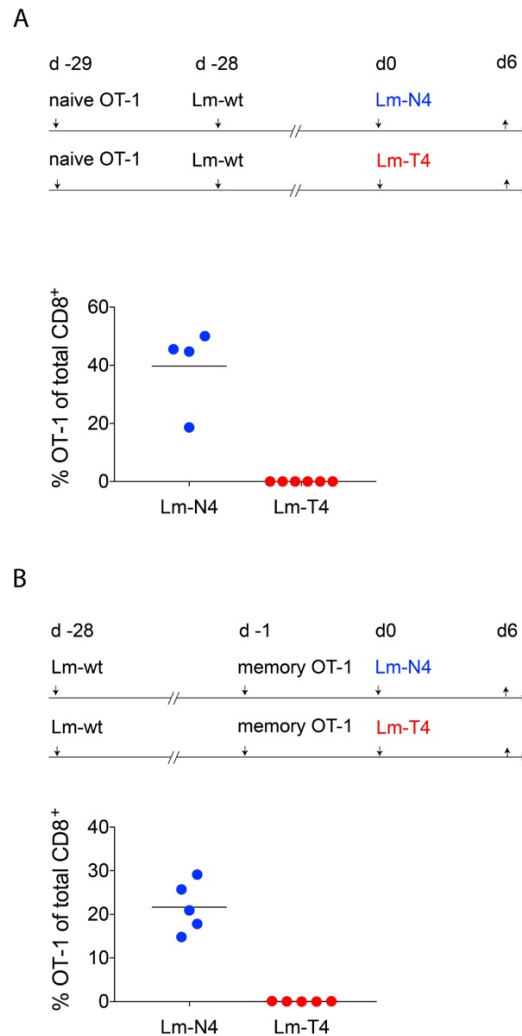

**OT-1 transferred prior to the primary Lm-wt infection and memory OT-1 also fail to respond to low affinity de novo stimulation in secondary *Listeria* infections. A:** In contrast to the setup in figure 1, the OT-1 T cells were transferred into mice prior to the initial *Listeria* wildtype infection. Four weeks later these mice or uninfected control mice were infected with the indicated *Listeria* strains. Frequency of OT-1 T cells among peripheral blood CD8<sup>+</sup> T cells was measured 6 days after infection. **B:** The same setup as in figure 1 has been used except that memory instead of naïve OT-1 were transferred. The memory T cells are derived from mice that had >30 days ago been grafted with OT-1 and infected with Lm-Ova. Shown is the frequency of OT-1 T cells among peripheral blood CD8<sup>+</sup> T cells measured 6 days after the infection.

**Supplementary Figure 2 (related to Figure 3):**

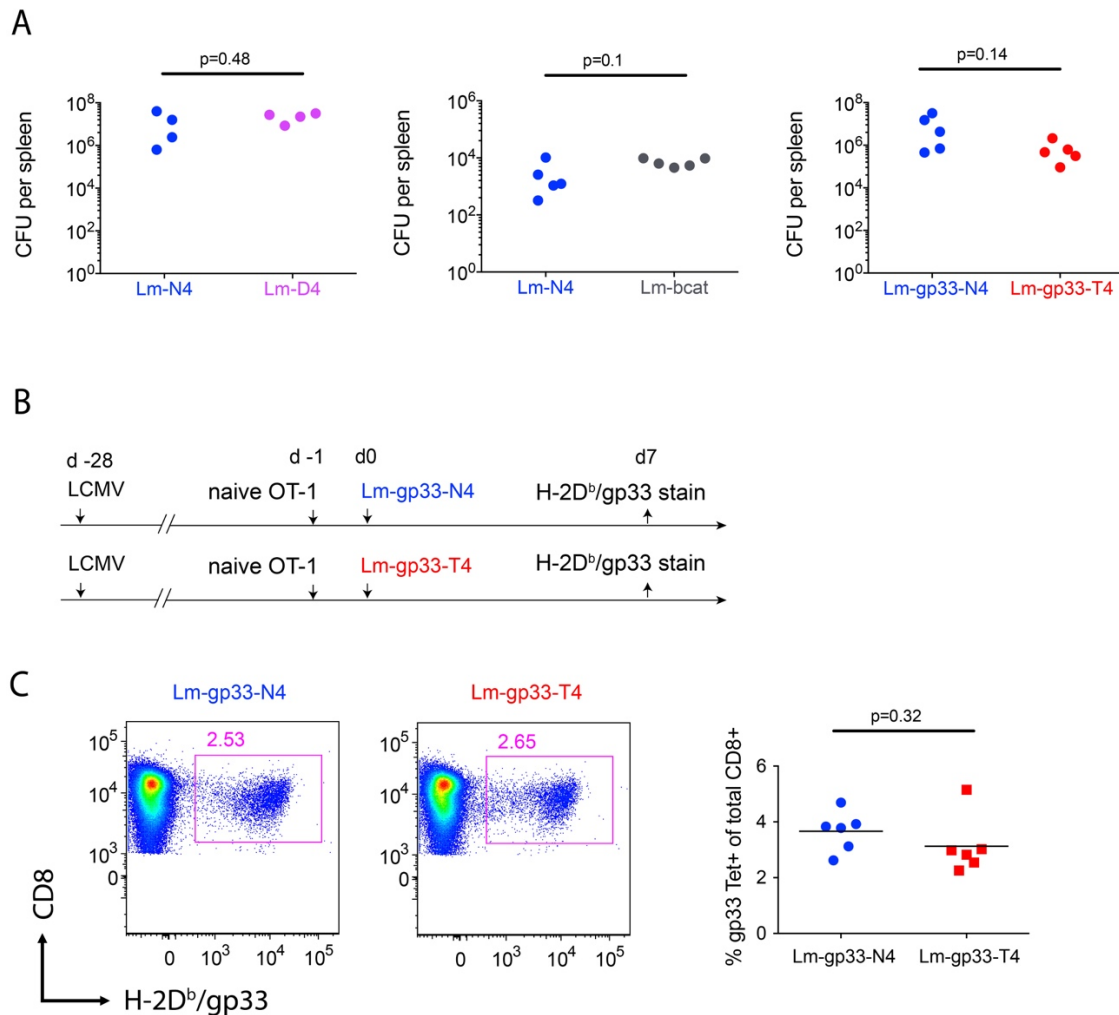

**Recombinant Lm-gp33-N4 and Lm-gp33-T4 expressing *Listeria* show similar capacity to stimulate gp33-specific T cells and similar in vivo growth rates. A:** Naïve C56BL/6 mice were infected with the indicated strains of *Listeria*. 2-4 days later, the numbers of colony forming units per spleen were enumerated. **B:** Schematic illustration of the experimental procedure. Naïve CD45.1 C57BL/6 mice were infected with LCMV. 28 days later mice received  $10^4$  naïve CD45.2 congenic OT-1 T cells and were infected with the indicated *Listeria* strains. **C:** Six days later, gp33-MHC multimers were used to determine the frequency of gp33-specific T cells among total endogenous CD8<sup>+</sup> T cells in these mice. The dot plots show representative stainings and the graphs data for all mice in the presented experiment.

**Supplementary Figure 3 (related to Figure 4):**

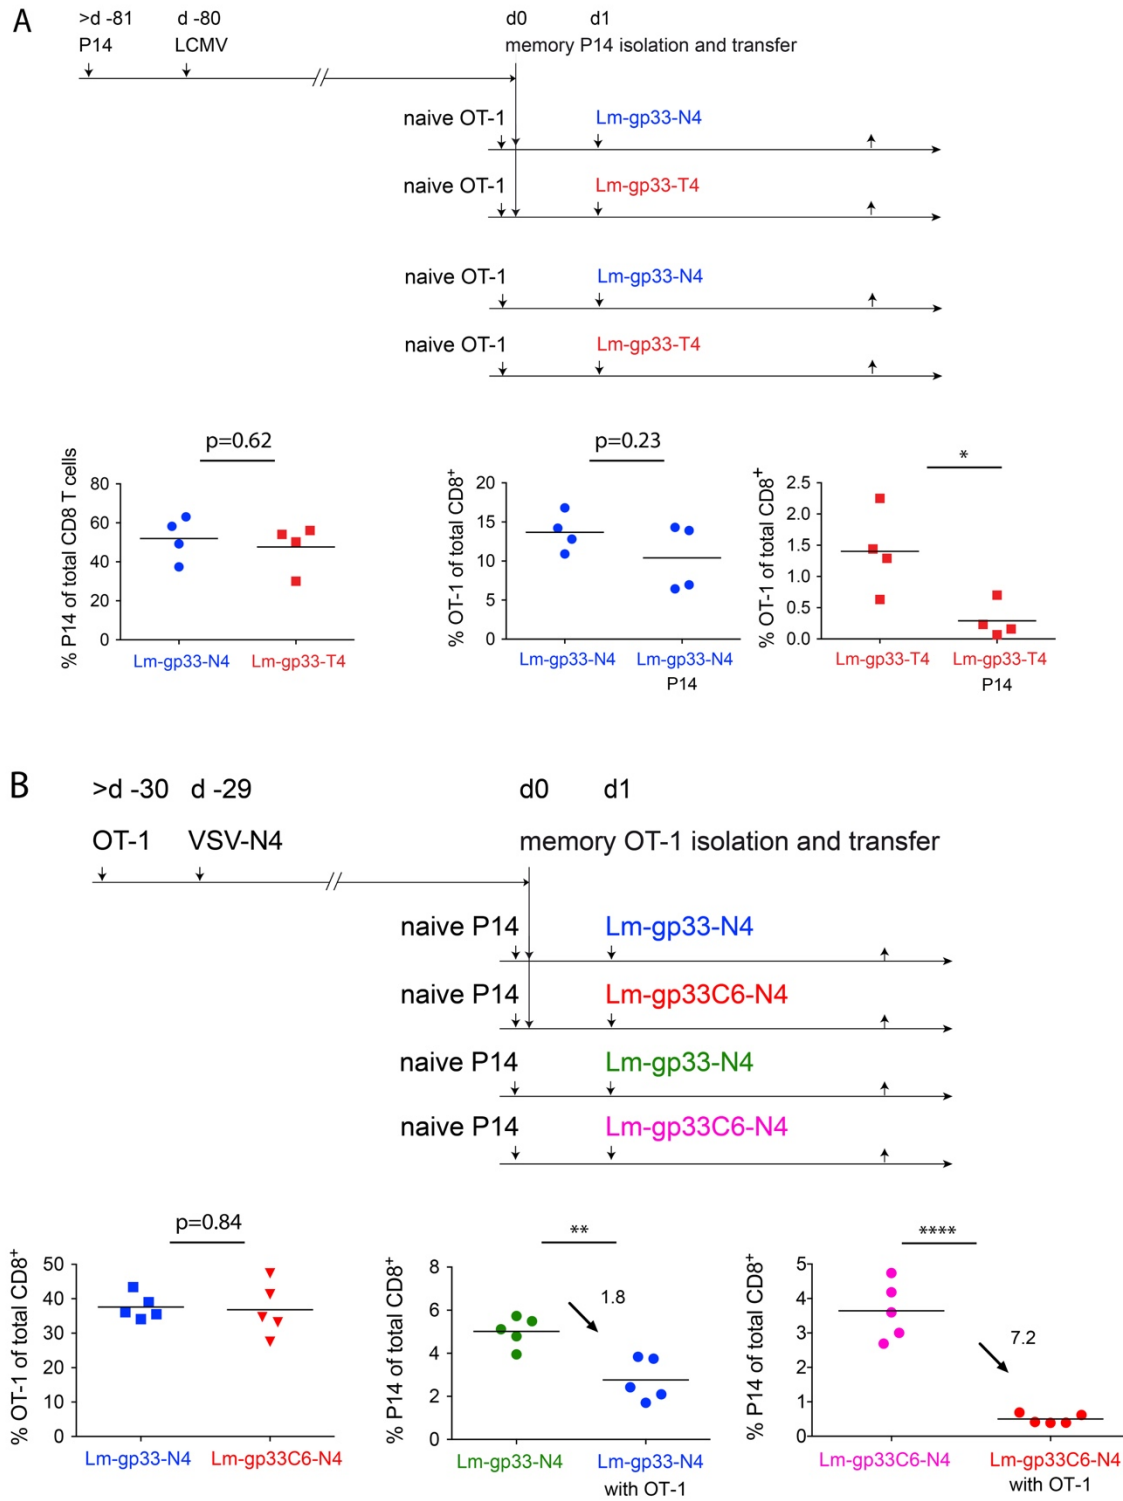

**Transferred memory P14 and OT-1 T cells selectively suppress the response to low affinity ligands but unlike endogenous memory T cells, they fail to completely suppress the**

**response. A:** Similar as in **Figure 4A** and **B** we transferred  $5 \times 10^5$  memory CD45.1/1 congenic P14 T cells into naïve C57BL/6 hosts but the memory P14 cells were this time harvested from C57BL/6 hosts that had 80 days ago been transferred with congenic naïve P14 T cells and infected with LCMV. These memory P14 were then transferred along with CD45.1/2 congenic  $10^4$  naïve OT-1 and the C57BL/6 hosts were infected with the indicated recombinant *Listeria* strains. We enumerated on day 6 post infection the numbers of P14 and OT-1 T cells in the blood. **B:** Naive CD45.1/2 OT-1 T cells were first transferred into naïve C57BL/6 hosts followed by an infection with a recombinant strain of VSV that expresses the Ova antigen (VSV-Ova). Memory OT-1 T cells were harvested 29 days later and transferred into naïve C57BL/6. These hosts were engrafted with naïve CD45.1/1 P14 T cells and infected with the indicated recombinant *Listeria* strains expressing Ovalbumin and a high (Lm-gp33-N4) or low affinity epitope for P14 T cells (Lm-gp33C6-N4). Number of P14 and OT-1 were determined 6 days later in the blood. Statistical analyses are unpaired Student's t tests with \*  $p < 0.1$ , \*\*  $p < 0.01$ , and \*\*\*\*  $p < 0.0001$ .
